# Supplementary material for: Cth2 Protein Mediates Early Adaptation of Yeast Cells to Oxidative Stress Conditions
Source: PubMed Central journal article supplement (PMC4732752; doi:10.1371/journal.pone.0148204), 2016-01-29

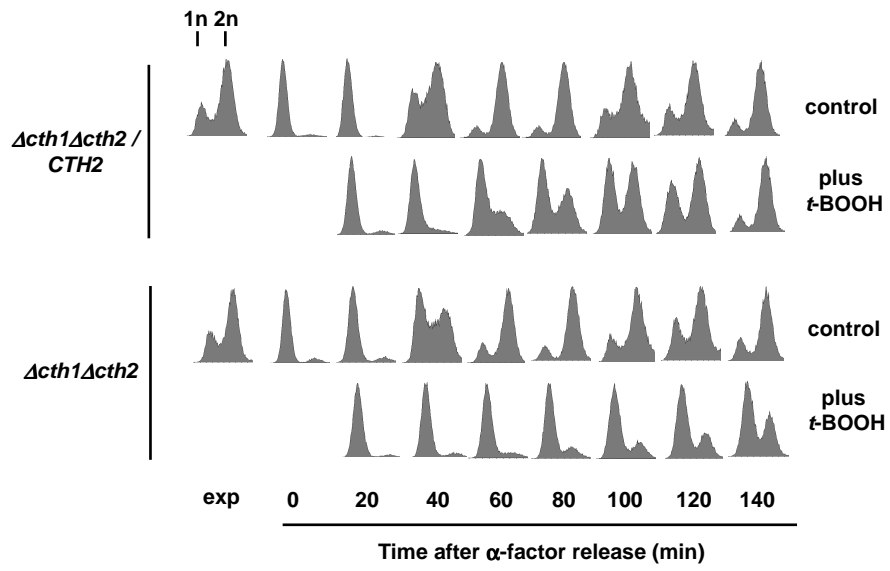

Supplement: pone.0148204.s001.pdf [file pone.0148204.s001.pdf]
